# Supplementary material for: Differentially expressed tRFs in CD5 positive relapsed & refractory diffuse large B cell lymphoma and the bioinformatic analysis for their potential clinical use
Source: Biol Direct. 2019 Nov 27;14:23. doi: 10.1186/s13062-019-0255-8 (PMC6882323; doi:10.1186/s13062-019-0255-8)
Supplement: Supplementary file 3 — Additional file 3. Table S1. The preliminary RT-PCR result of UBA52 in several DLBCL cell lines compared with the healthy ones. [file 13062_2019_255_MOESM3_ESM.xlsx]

## Sheet: Sheet1
Experiment: 20190724QQY Active filter: SYBR Green I / HRM Dye (465-510)
Color	Pos	Sample Name	Type	Filter Comb	Target Name	Cp
16744448	A2	ST	Reference Calibrator	465-510	GAPDH	24.5132
255	A3	ST	Reference Calibrator	465-510	GAPDH	23.622
3200768	A4	ZY	Reference Unknown	465-510	GAPDH	21.1129
16711935	A5	ZY	Reference Unknown	465-510	GAPDH	21.5487
8421504	A6	QY	Reference Unknown	465-510	GAPDH	20.7534
1234938	A7	QY	Reference Unknown	465-510	GAPDH	20.5293
151	A8	Z	Reference Unknown	465-510	GAPDH	28.2996
16776975	A9	Z	Reference Unknown	465-510	GAPDH	29.057
4210688	A10	G	Reference Unknown	465-510	GAPDH	25.8867
4227327	A11	G	Reference Unknown	465-510	GAPDH	25.9531
16581273	B2	ST	Target Calibrator	465-510	UBA52	29.1477
2540728	B3	ST	Target Calibrator	465-510	UBA52	30.6563
16744448	B4	ZY	Target Unknown	465-510	UBA52	29.5406
255	B5	ZY	Target Unknown	465-510	UBA52	27.9789
3200768	B6	QY	Target Unknown	465-510	UBA52	27.1484
16711935	B7	QY	Target Unknown	465-510	UBA52	24.6995
8421504	B8	Z	Target Unknown	465-510	UBA52	32.7842
1234938	B9	Z	Target Unknown	465-510	UBA52	32.8445
151	B10	G	Target Unknown	465-510	UBA52	31.4322
16776975	B11	G	Target Unknown	465-510	UBA52	31.1096
16581273	C4	LY1	Reference Unknown	465-510	GAPDH	17.85
2540728	C5	LY1	Reference Unknown	465-510	GAPDH	19.5884
16744448	C6	LY3	Reference Unknown	465-510	GAPDH	16.3452
255	C7	LY3	Reference Unknown	465-510	GAPDH	15.7167
3200768	C8	LY8	Reference Unknown	465-510	GAPDH	18.5812
16711935	C9	LY8	Reference Unknown	465-510	GAPDH	18.2833
8421504	C10	LY10	Reference Unknown	465-510	GAPDH	16.7985
1234938	C11	LY10	Reference Unknown	465-510	GAPDH	16.0628
4210688	D4	LY1	Target Unknown	465-510	UBA52	26.2746
4227327	D5	LY1	Target Unknown	465-510	UBA52	26.6362
16581273	D6	LY3	Target Unknown	465-510	UBA52	25.8904
2540728	D7	LY3	Target Unknown	465-510	UBA52	25.6596
16744448	D8	LY8	Target Unknown	465-510	UBA52	26.6816
255	D9	LY8	Target Unknown	465-510	UBA52	27.2884
3200768	D10	LY10	Target Unknown	465-510	UBA52	24.1421
16711935	D11	LY10	Target Unknown	465-510	UBA52	23.1774
